# Supplementary material for: The Effect of Extraction Methods on Phytochemicals and Biological Activities of Green Coffee Beans Extracts
Source: MDPI journal article supplement (doi:10.3390/plants12040712), 2023-02-06
Supplement: s1 [file s1]

# The Effect of Extraction Method on Phytochemicals and Biological Activities of Green Coffee Beans Extracts

Octavia Gligor<sup>1</sup>, Simona Clichici<sup>2</sup>, Remus Moldovan<sup>2</sup>, Dana Muntean<sup>3</sup>, Ana-Maria Vlase<sup>1,\*</sup>, George Cosmin Nadăș<sup>4</sup>, Ioana Adriana Matei<sup>4</sup>, Gabriela Adriana Filip<sup>2,\*</sup>, Laurian Vlase<sup>3</sup>, and Gianina Crișan<sup>1</sup>

<sup>1</sup> Department of Pharmaceutical Botany, Iuliu Hațieganu University of Medicine and Pharmacy, 8 Victor Babeș Street, 400347 Cluj-Napoca, Romania

<sup>2</sup> Department of Physiology, Iuliu Hațieganu University of Medicine and Pharmacy, 8 Victor Babeș Street, 400347 Cluj-Napoca, Romania

<sup>3</sup> Department of Pharmaceutical Technology and Biopharmaceutics, University of Medicine and Pharmacy, 8 Victor Babeș Street, 400347 Cluj-Napoca, Romania

<sup>4</sup> Department of Microbiology, University of Agricultural Sciences and Veterinary Medicine, 3/5 Mănăștur Street, 400372 Cluj-Napoca, Romania

\* Correspondence: gabriela.filip@umfcluj.ro (G.A.F.); gheldiu.ana@umfcluj.ro (A.-M.V.)

## 4. Materials and Methods

### 4.6. Chromatographic Analysis

The UV chromatograms of the polyphenolic compounds detected in the analyzed extracts are displayed in Figures S1–S11 (the UV detector operated at  $\lambda=330$  nm and for detection of the flavonoids and their aglycones, the UV detector operated at  $\lambda=370$  nm).

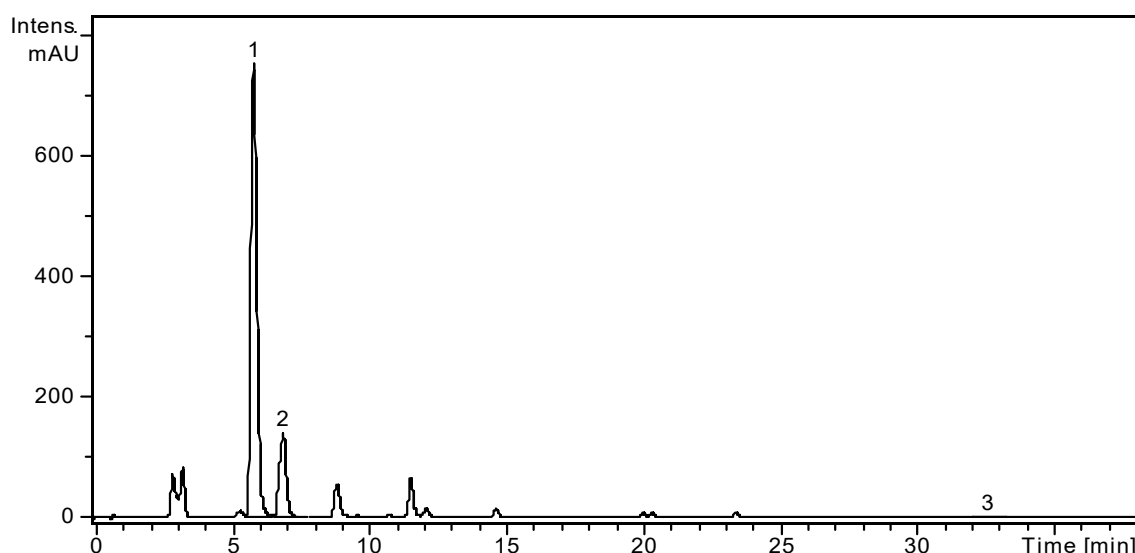

**Figure S1.** UV chromatogram of sample M: (1) chlorogenic acid, (2) kaempferol

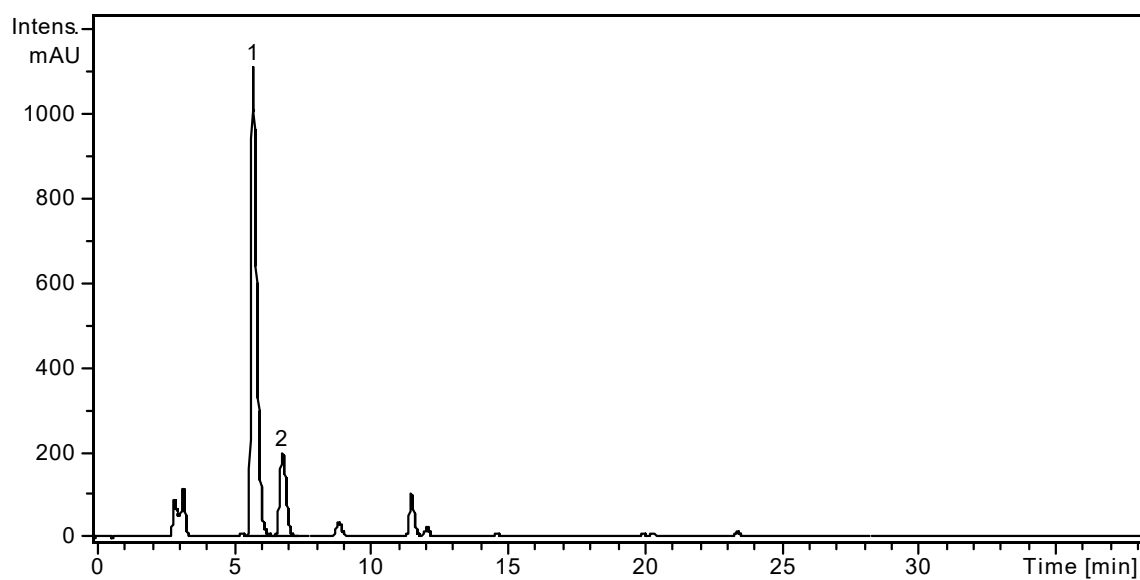

**Figure S2.** UV chromatogram of sample S20: (1) chlorogenic acid

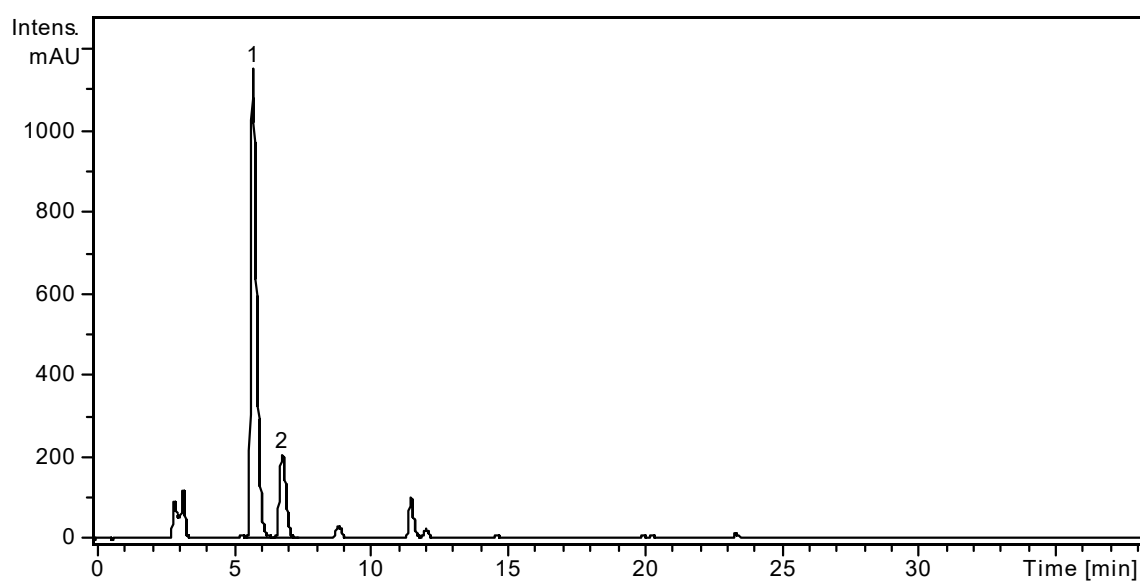

**Figure S3.** UV chromatogram of sample S40: (1) chlorogenic acid

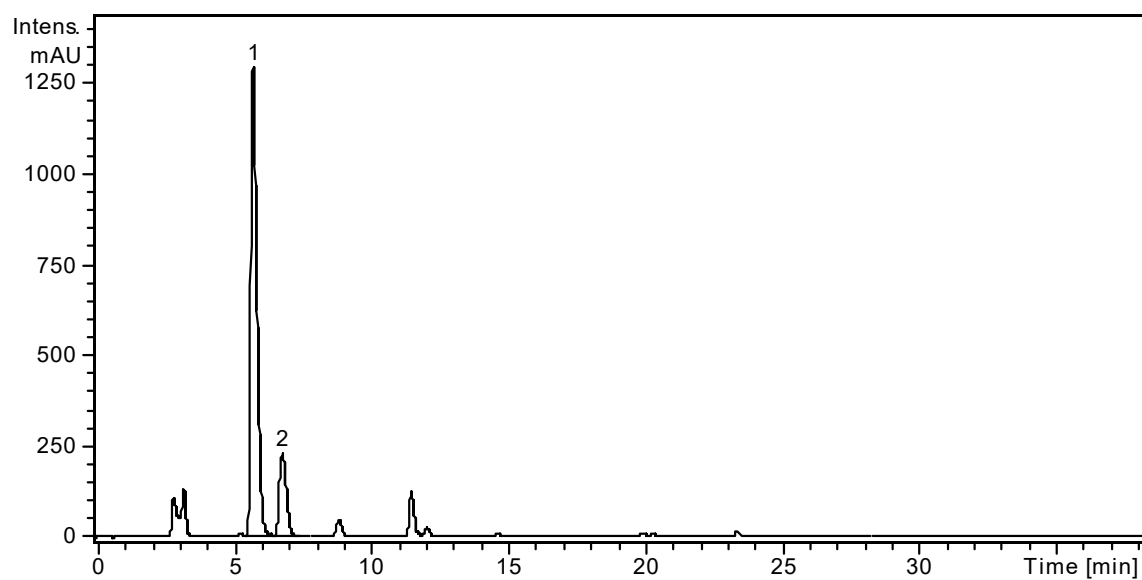

**Figure S4.** UV chromatogram of sample S60: (1) chlorogenic acid

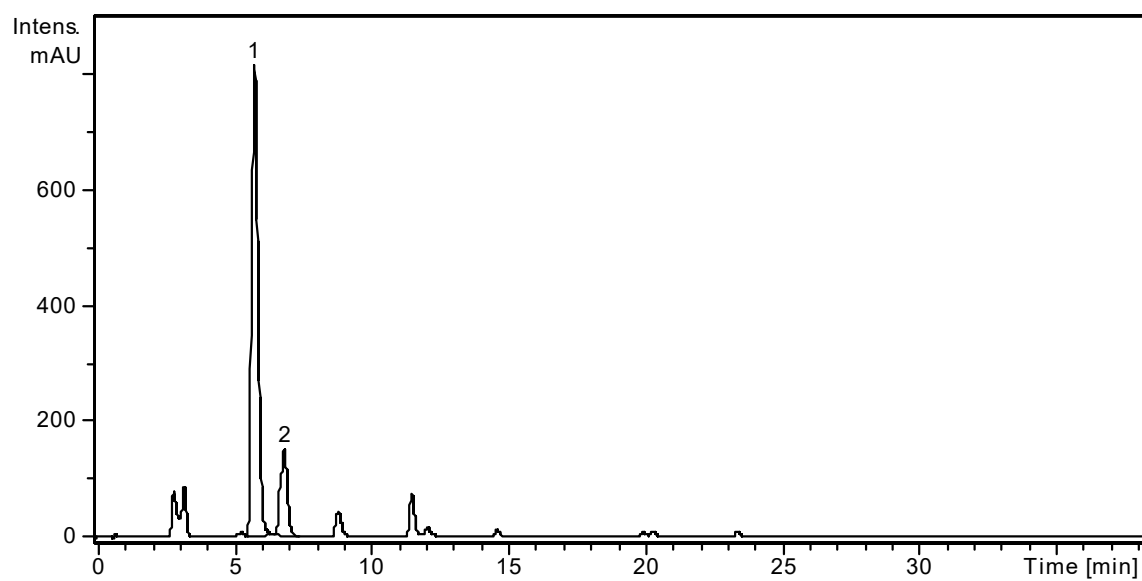

**Figure S5.** UV chromatogram of sample T24: (1) chlorogenic acid

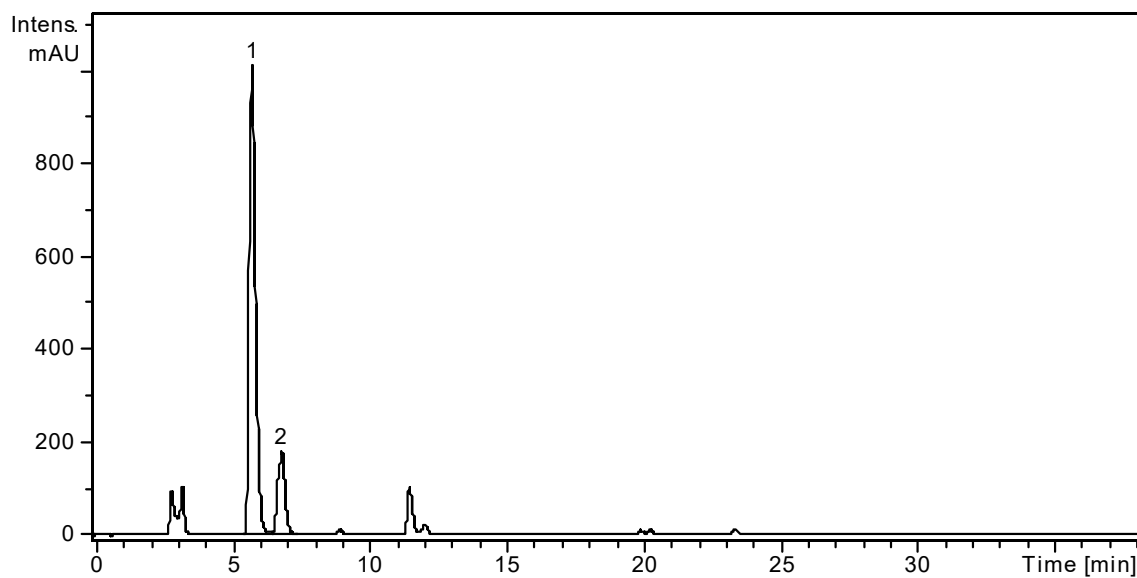

**Figure S6.** UV chromatogram of sample T44: (1) chlorogenic acid

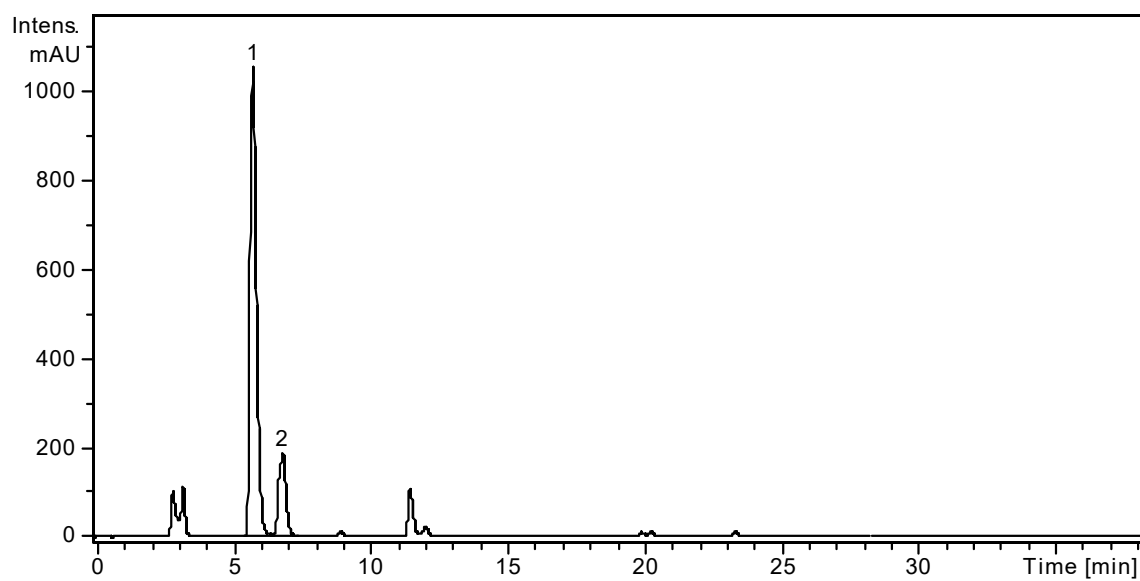

**Figure S7.** UV chromatogram of sample T46: (1) chlorogenic acid

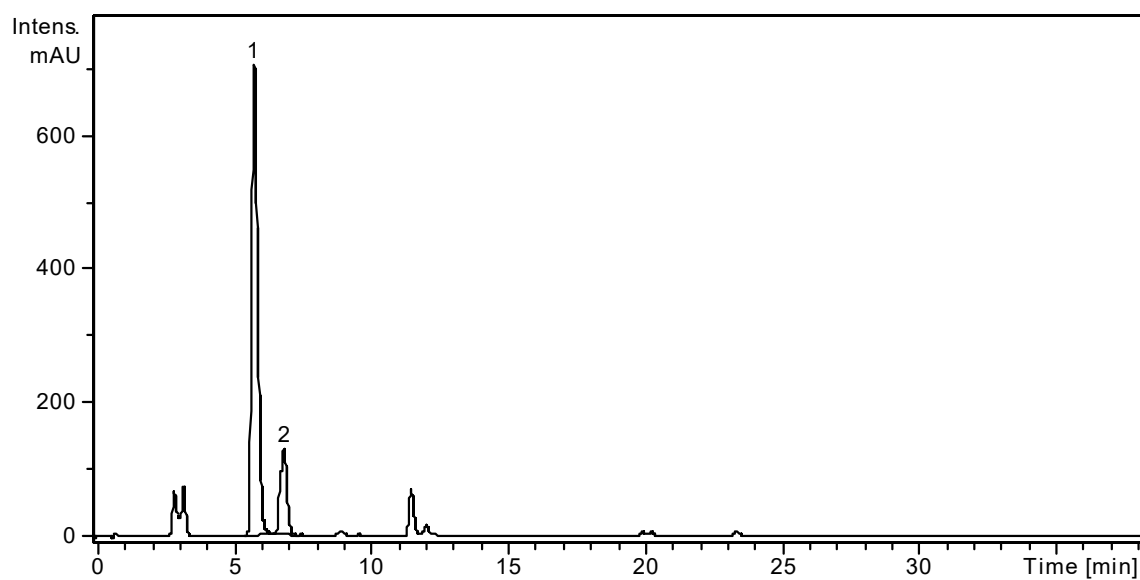

**Figure S8.** UV chromatogram of sample U23: (1) chlorogenic acid

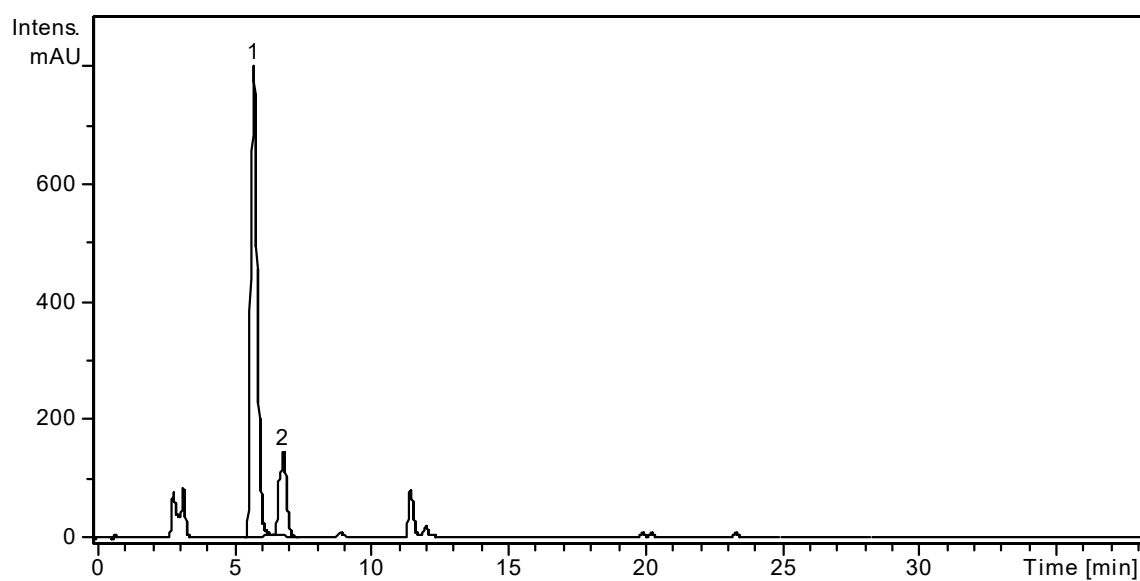

**Figure S9.** UV chromatogram of sample U34: (1) chlorogenic acid

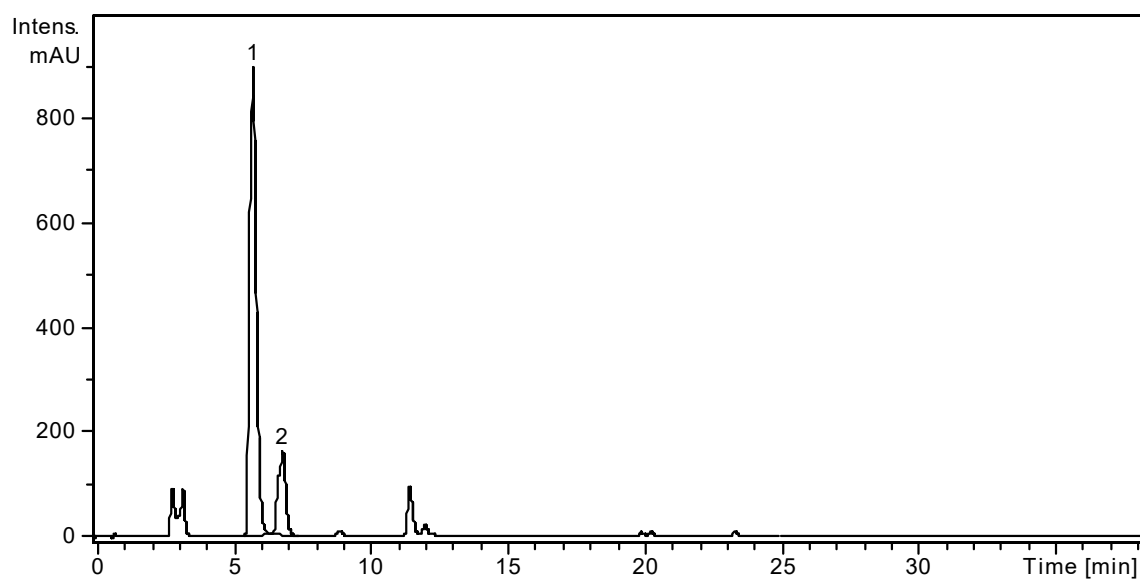

**Figure S10.** UV chromatogram of sample U35: (1) chlorogenic acid

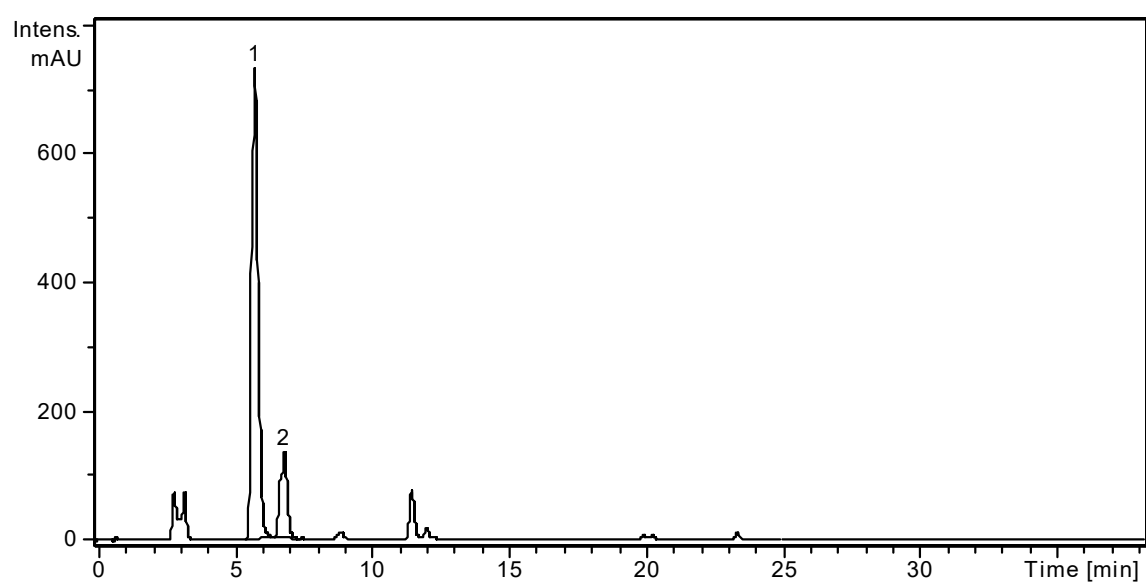

**Figure S11.** UV chromatogram of sample UT: (1) chlorogenic acid

Table S1 includes the analytical parameters of the database, such as retention time, precursor m/z, and specific ions used for the identification of the polyphenolic compounds, as well as the MS analysis type.

**Table S1.** MS analysis type and the characteristic ions from the mass spectrum of the analyzed polyphenolic compounds

| No. | Bioactive compound name | MS analysis type | Retention time | Specific ions for identification<br>Ion [M-H] <sup>+</sup> >Ions from spectra |
|-----|-------------------------|------------------|----------------|-------------------------------------------------------------------------------|
| 1   | Caftaric acid           | MRM*             | 3.1            | 311>148.6, 178.6                                                              |
| 2   | Genistic acid           | MRM              | 3.7            | 153>108.7                                                                     |
| 3   | Caffeic acid            | MRM              | 5.9            | 179.4>134.7                                                                   |
| 4   | Chlorogenic acid        | MRM              | 6.6            | 353.5>178.7, 190.7                                                            |
| 5   | 4-O-caffeoylquinic acid | MRM              | 7.0            | 354.31>173, 179                                                               |
| 6   | p-coumaric acid         | MRM              | 9.2            | 163> 118.7                                                                    |
| 7   | Ferulic acid            | MRM              | 12.4           | 193.2>133.7, 148.7, 177.6                                                     |
| 8   | Sinapic acid            | MRM              | 14.7           | 223.4>148.6, 163.6, 178.7, 207.7                                              |
| 9   | Vitexin                 | SIM**            | 18.0           | 431                                                                           |
| 10  | Hyperoside              | SIM              | 19.0           | 463                                                                           |
| 11  | Vitexin 2-O-rhamnoside  | SIM              | 19.4           | 577                                                                           |
| 12  | Isoquercitrin           | SIM              | 19.9           | 463                                                                           |
| 13  | Rutin                   | SIM              | 20.4           | 609.1                                                                         |
| 14  | Myricetin               | SIM              | 21.1           | 317.1                                                                         |
| 15  | Fisetin                 | SIM              | 22.8           | 285                                                                           |
| 16  | Quercitrin              | SIM              | 23.3           | 447.1                                                                         |
| 17  | Kaempferitrin           | SIM              | 25.6           | 577                                                                           |
| 18  | Quercetol               | SIM              | 26.8           | 301                                                                           |
| 19  | Kaempferol 3-rhamnoside | SIM              | 27.4           | 431                                                                           |
| 20  | Patuletin               | SIM              | 28.7           | 331                                                                           |
| 21  | Luteolin                | SIM              | 29.2           | 285                                                                           |
| 22  | Kaempferol              | SIM              | 31.7           | 285                                                                           |
| 23  | Apigenin                | SIM              | 33.2           | 269.2                                                                         |

\* MRM= multiple reaction monitoring

\*\* SIM= single ion monitoring
